# Supplementary material for: Statistical Improvement of rGILCC 1 and rPOXA 1B Laccases Activity Assay Conditions Supported by Molecular Dynamics
Source: MDPI journal article supplement (doi:10.3390/molecules28217263), 2023-10-25
Supplement: s1 [file s1]

## Statistical Improvement of rGILCC 1 and rPOXA 1B Laccases Activity Assay Conditions Supported by Molecular Dynamics

María P. C. Mora-Gamboa <sup>1,†</sup>, María C. Ferrucho-Calle <sup>1,†</sup>, Leidy D. Ardila-Leal <sup>1,2</sup>, Lina M. Rojas-Ojeda <sup>3</sup>, Johan F. Galindo <sup>3,\*</sup>, Raúl A. Poutou-Piñales <sup>1,\*</sup>, Aura M. Pedroza-Rodríguez <sup>4</sup> and Balkys E. Quevedo-Hidalgo <sup>5</sup>

<sup>1</sup>Laboratorio de Biotecnología Molecular, Grupo de Biotecnología Ambiental e Industrial (GBAI), Departamento de Microbiología, Facultad de Ciencias, Pontificia Universidad Javeriana, Bogotá 110231, Colombia

<sup>2</sup>Laboratorio de Biotecnología Vegetal, Grupo de Investigación en Asuntos Ambientales y Desarrollo Sostenible (MINDALA), Departamento de Ciencias Agrarias y del Ambiente, Universidad Francisco de Paula Santander, Ocaña 546552, Colombia

<sup>3</sup>Departamento de Química, Universidad Nacional de Colombia, Bogotá 111321, Colombia

<sup>4</sup>Laboratorio de Microbiología Ambiental y Suelos, Grupo de Biotecnología Ambiental e Industrial (GBAI), Departamento de Microbiología, Facultad de Ciencias, Pontificia Universidad Javeriana, Bogotá 110231, Colombia

<sup>5</sup>Laboratorio de Biotecnología Aplicada, Grupo de Biotecnología Ambiental e Industrial (GBAI), Departamento de Microbiología, Facultad de Ciencias, Pontificia Universidad Javeriana, Bogotá 110231, Colombia

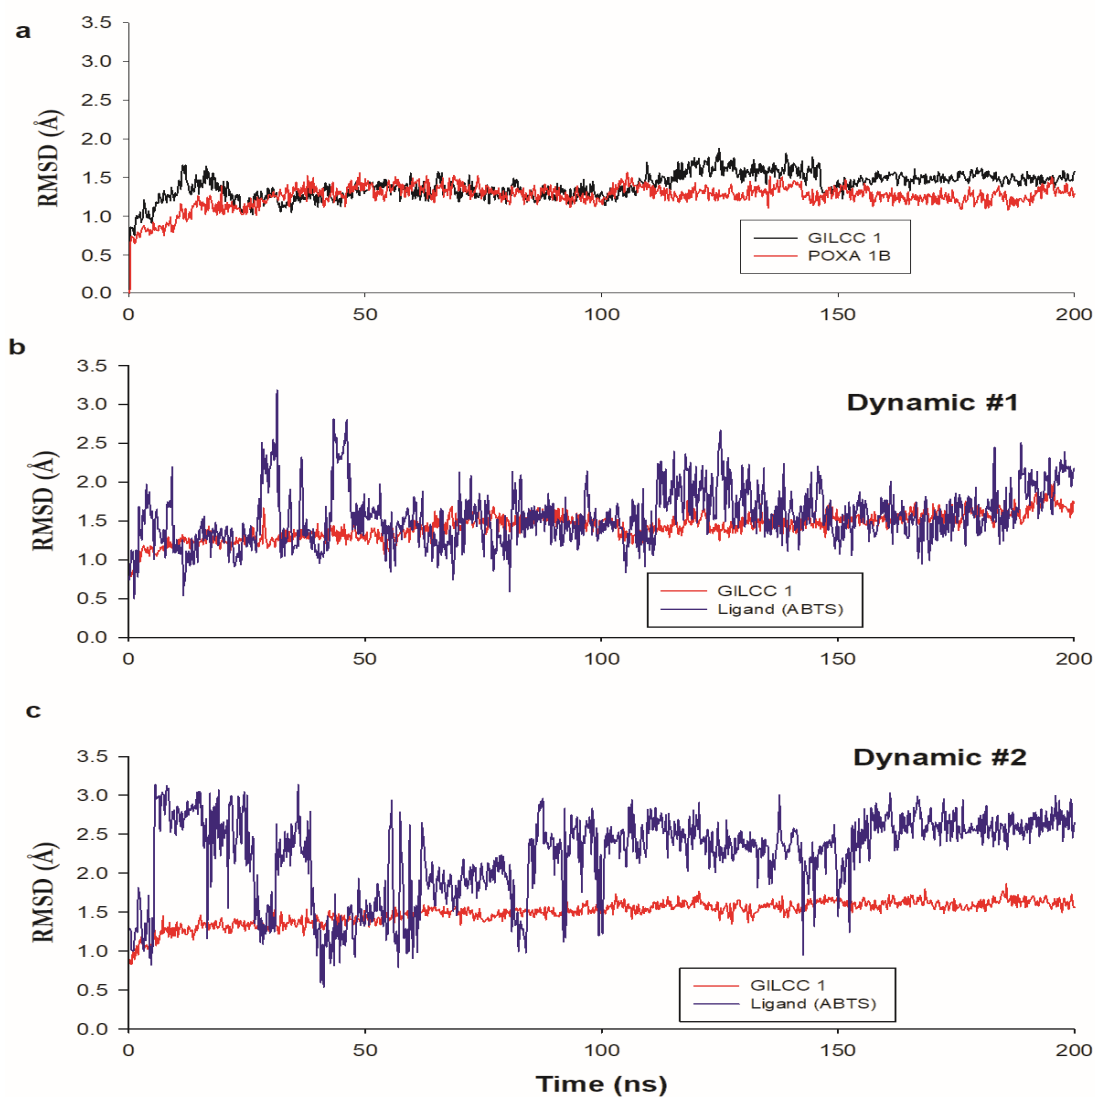

**Fig. S1. Root Mean Square Deviation (RMSD).** **a.** RMSD values of the complexes. GILCC 1-ABTS and POXA 1B-ABTS, at pH 3, along the trajectory (200 ns). **b.** RMSD of ligand and receptor in dynamics assay 1. **c.** RMSD of ligand and receptor in dynamics assay 2.

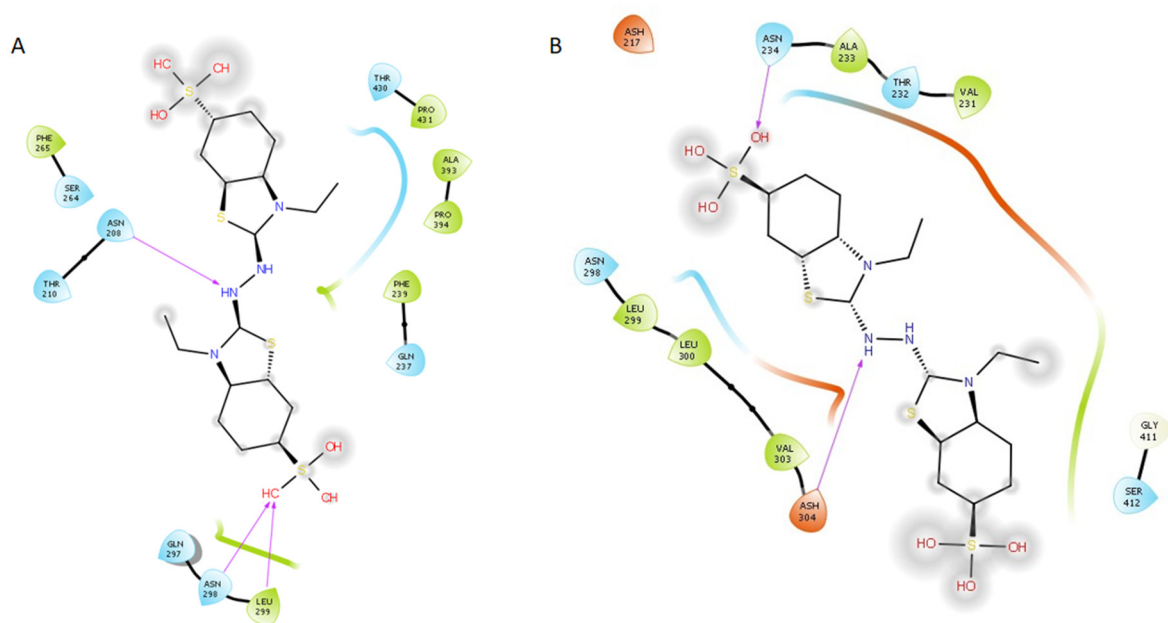

**Fig. S2. 2D contact maps of last frame interactions (GILCC 1-ABTS). a. First molecular dynamics assay. b. Second molecular dynamics assay**

**Table S1.** Amino acid protonation state at pH 3.0 of GILCC1 and POXA 1B

| GILCC 1 |     |       |         |     |       | POXA 1B |     |       |         |     |       |
|---------|-----|-------|---------|-----|-------|---------|-----|-------|---------|-----|-------|
| Residue |     | pKa   |
| ASP     | 18  | 2.84  | LYS     | 40  | 10.22 | ASP     | 18  | 3.14  | LYS     | 37  | 10.36 |
| ASP     | 96  | 3.07  | LYS     | 59  | 10.43 | ASP     | 42  | 2.55  | LYS     | 39  | 10.29 |
| ASP     | 101 | 3.8   | LYS     | 71  | 10.06 | ASP     | 77  | 6.95  | LYS     | 51  | 10.29 |
| ASP     | 118 | 1.37  | LYS     | 130 | 10.5  | ASP     | 96  | 3.49  | LYS     | 71  | 10.36 |
| ASP     | 128 | 2.75  | LYS     | 134 | 10.22 | ASP     | 118 | 1     | LYS     | 129 | 10.5  |
| ASP     | 131 | 0.77  | LYS     | 194 | 10.5  | ASP     | 131 | 1.15  | LYS     | 134 | 10.36 |
| ASP     | 138 | 2.81  | LYS     | 311 | 8.95  | ASP     | 138 | 2.7   | LYS     | 191 | 10.43 |
| ASP     | 140 | -2.39 | LYS     | 378 | 10.5  | ASP     | 140 | -1.91 | LYS     | 193 | 10.5  |
| ASP     | 150 | 1.74  | ARG     | 22  | 12.16 | ASP     | 150 | 1.11  | LYS     | 281 | 10.5  |
| ASP     | 167 | 3.19  | ARG     | 43  | 12.15 | ASP     | 166 | 4.2   | LYS     | 309 | 10.5  |
| ASP     | 214 | -0.06 | ARG     | 121 | 10.33 | ASP     | 213 | -0.48 | LYS     | 310 | 12.03 |
| ASP     | 224 | -0.86 | ARG     | 157 | 12.06 | ASP     | 223 | -2.14 | LYS     | 315 | 10.5  |
| ASP     | 323 | 1.91  | ARG     | 176 | 11.87 | ASP     | 233 | 1.69  | LYS     | 376 | 10.5  |
| ASP     | 424 | 7.29  | ARG     | 195 | 11.59 | ASP     | 322 | 2.63  | ARG     | 5   | 12.5  |
| ASP     | 470 | 3.88  | ARG     | 197 | 18.29 | ASP     | 362 | 4.01  | ARG     | 22  | 11.74 |
| GLU     | 222 | 1.7   | ARG     | 199 | 13.73 | ASP     | 365 | 2.1   | ARG     | 43  | 12.01 |
| GLU     | 302 | 4.1   | ARG     | 243 | 11.53 | ASP     | 423 | 4.15  | ARG     | 121 | 11.91 |
| GLU     | 381 | 0.76  | ARG     | 260 | 13.32 | ASP     | 430 | 2.59  | ARG     | 135 | 12.22 |
| GLU     | 469 | 4.44  | ARG     | 280 | 11.38 | ASP     | 442 | 3.93  | ARG     | 175 | 11.31 |
| CYS     | 85  | 9     | ARG     | 316 | 12.5  | GLU     | 142 | 4.65  | ARG     | 194 | 11.66 |
| TYR     | 20  | 10    | ARG     | 408 | 11.45 | GLU     | 221 | 0.67  | ARG     | 196 | 17.53 |
| TYR     | 95  | 10.54 | ARG     | 423 | 14.68 | GLU     | 225 | 3.78  | ARG     | 198 | 14.6  |
| TYR     | 108 | 12.5  | ARG     | 440 | 13.22 | GLU     | 301 | 3.19  | ARG     | 242 | 12.62 |
| TYR     | 116 | 12.86 |         |     |       | GLU     | 382 | 1.28  | ARG     | 259 | 13.38 |
| TYR     | 127 | 11.21 |         |     |       | GLU     | 467 | 6.28  | ARG     | 279 | 11.45 |
| TYR     | 137 | 11.38 |         |     |       | TYR     | 21  | 10    | ARG     | 284 | 12.5  |
| TYR     | 152 | 15.52 |         |     |       | TYR     | 31  | 11.13 | ARG     | 305 | 12.5  |
| TYR     | 196 | 9.04  |         |     |       | TYR     | 95  | 11.63 | ARG     | 361 | 12.5  |
| TYR     | 209 | 14.15 |         |     |       | TYR     | 108 | 12.11 | ARG     | 407 | 11.1  |
| TYR     | 244 | 11.57 |         |     |       | TYR     | 116 | 12.63 | ARG     | 421 | 11.29 |
| TYR     | 257 | 9.45  |         |     |       | TYR     | 127 | 12.08 | ARG     | 422 | 14.77 |
| TYR     | 281 | 9.76  |         |     |       | TYR     | 137 | 11.12 | ARG     | 438 | 10.82 |
| TYR     | 372 | 10.87 |         |     |       | TYR     | 152 | 14.42 |         |     |       |
| TYR     | 415 | 9.27  |         |     |       | TYR     | 185 | 10.6  |         |     |       |
| TYR     | 417 | 10.85 |         |     |       | TYR     | 195 | 8.98  |         |     |       |
|         |     |       |         |     |       | TYR     | 208 | 12.11 |         |     |       |
|         |     |       |         |     |       | TYR     | 243 | 11.47 |         |     |       |
|         |     |       |         |     |       | TYR     | 256 | 10.14 |         |     |       |
|         |     |       |         |     |       | TYR     | 280 | 10.24 |         |     |       |
|         |     |       |         |     |       | TYR     | 302 | 10.07 |         |     |       |
|         |     |       |         |     |       | TYR     | 373 | 9.66  |         |     |       |
|         |     |       |         |     |       | TYR     | 414 | 8.75  |         |     |       |

|  |  |  |  |  |  |     |     |       |  |  |  |
|--|--|--|--|--|--|-----|-----|-------|--|--|--|
|  |  |  |  |  |  | TYR | 416 | 13.01 |  |  |  |
|  |  |  |  |  |  | TYR | 489 | 10    |  |  |  |
